# Supplementary material for: Dual functional SiO2@TiO2photonic crystals for dazzling structural colors and enhanced photocatalytic activity
Source: Royal Society of Chemistry journal article supplement (doi:10.1039/c9tc03426a), 2019-01-01
Supplement: c9tc03426a1.pdf [file c9tc03426a1.pdf]

**Supplementary material:**

# **Dual Function of SiO<sub>2</sub>@TiO<sub>2</sub> Photonic Crystals for Dazzling Structural Colors and Enhanced Photocatalytic Activity**

*Fen Wang<sup>a</sup>, Li Feng<sup>a</sup>, Yi Qin<sup>a,\*</sup>, Ting Zhao<sup>a</sup>, Hongjie Luo<sup>b</sup>, Jianfeng Zhu<sup>a</sup>*

<sup>a</sup> School of Materials Science and Engineering, Shaanxi University of Science and Technology, Xi'an 710021, People's Republic of China

<sup>b</sup> School of Materials Science and Engineering, Shanghai University, Shanghai 200444, People's Republic of China

**\*Corresponding Authors:**

E-mail: qinyi@sust.edu.cn.

Tel.: +8615291868179.

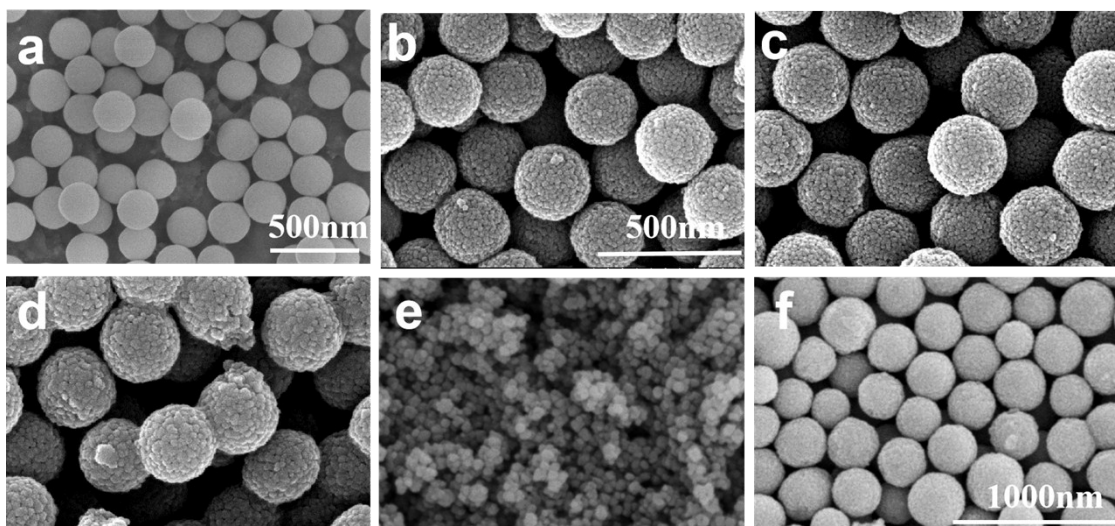

**Fig. S1.** SEM of images of (a) 240nm SiO<sub>2</sub> and (b) ST-30; (c) ST-50 and (d) ST-60; (e) P25 and T1(f).

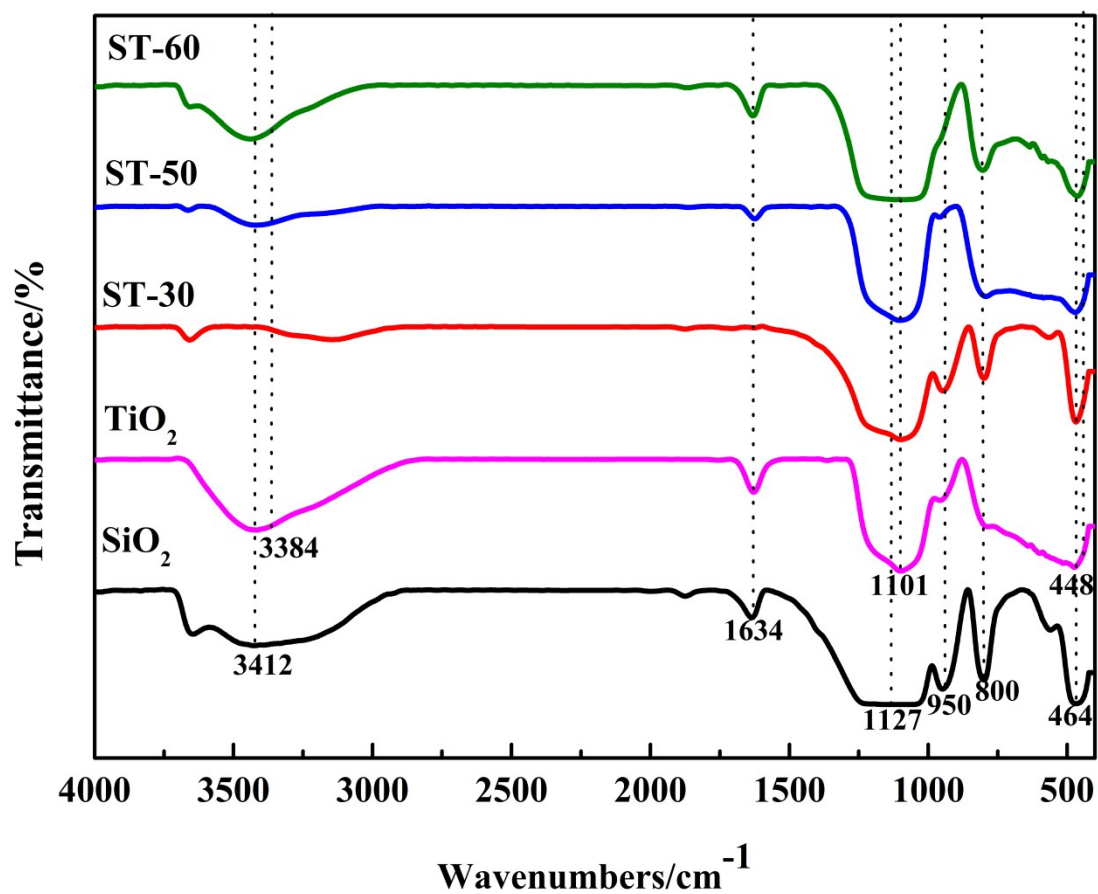

**Fig. S2.** FT-IR spectra of SiO<sub>2</sub>, TiO<sub>2</sub> and SiO<sub>2</sub>@TiO<sub>2</sub> photonic crystals.

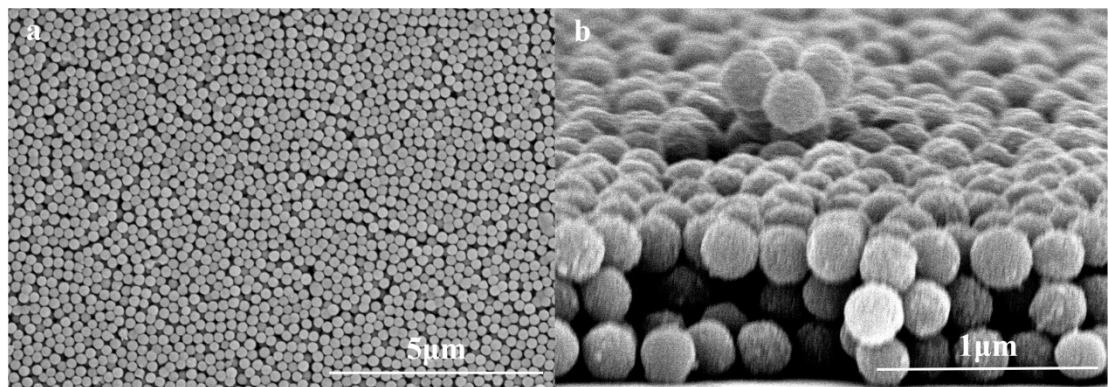

**Fig. S3.** The cross-sectional (a) and top (b) SEM of the SiO<sub>2</sub>@TiO<sub>2</sub> photonic crystals.

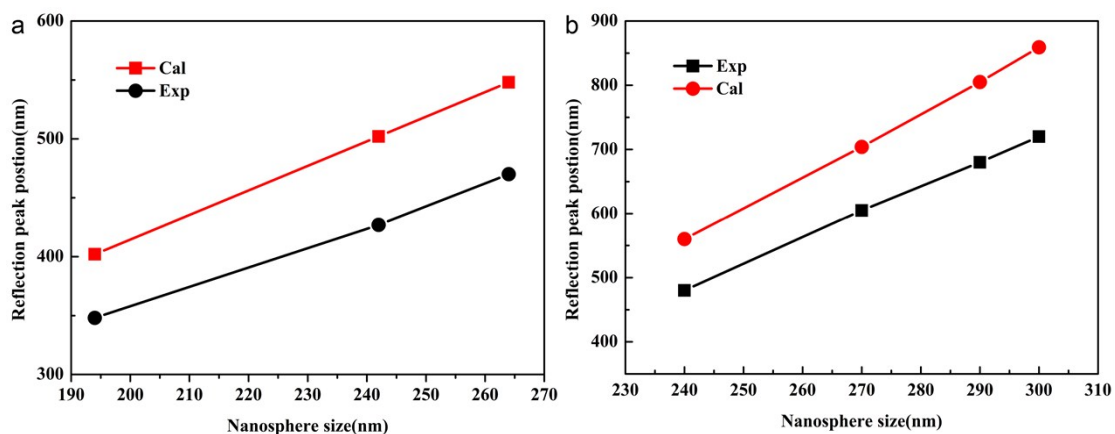

**Fig S4** The experimental (exp) reflection positions and calculated (cal) of a) SiO<sub>2</sub> PCs and b) SiO<sub>2</sub>@TiO<sub>2</sub> PCs.

**Table 1** Diameters of composition SiO<sub>2</sub>@TiO<sub>2</sub> nanospheres

| D-SiO <sub>2</sub><br>(nm) | Ref peak<br>(cal) | Ref peak<br>(exp) | D-ST<br>(nm) | Shell Thickness | Ref peak<br>(cal) | Ref peak<br>(exp) |
|----------------------------|-------------------|-------------------|--------------|-----------------|-------------------|-------------------|
| 194                        | 348               | 402               | 271          | 29              | 704               | 605               |
| 242                        | 427               | 502               | 286          | 44              | 805               | 680               |
| 264                        | 470               | 548               | 304          | 62              | 859               | 705               |

**Table 2** Diameters and reflection peaks of SiO<sub>2</sub> and SiO<sub>2</sub>@TiO<sub>2</sub> nanospheres

| Simple | SiO <sub>2</sub> (g) | TBOT(mmol) | (%)TiO <sub>2</sub> (wt) | Parcittle size(nm) |
|--------|----------------------|------------|--------------------------|--------------------|
| Silica | --                   | --         | 0                        | 242                |
| ST-30  | 0.3                  | 2.93       | 31.57                    | 271                |
| ST-50  | 0.3                  | 5.68       | 50.11                    | 286                |
| ST-60  | 0.3                  | 8.51       | 63.05                    | 304                |
| T1     | --                   | 8.51       | 100                      | 10                 |

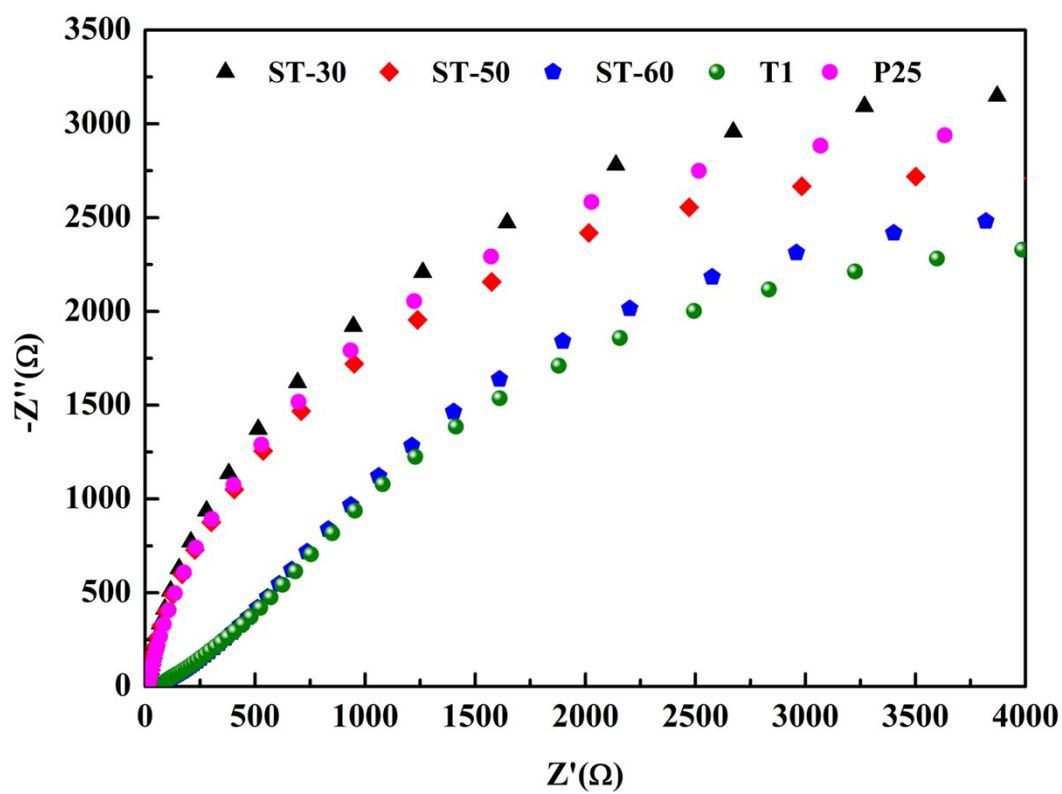

**Fig. S5.** EIS plots of the samples.

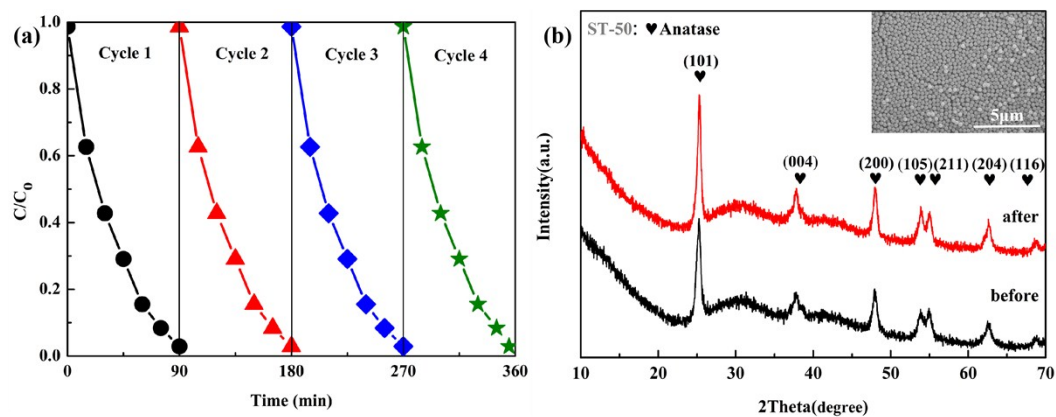

**Fig S6.** Photodegradation of RhB by recovered ST-50 showed recyclability in the repeated photocatalytic cycle. (b) XRD patterns of ST-50 before and after 4th run cycle photocatalytic experiments, (the inset is the SEM image after 4th repeated irradiation).

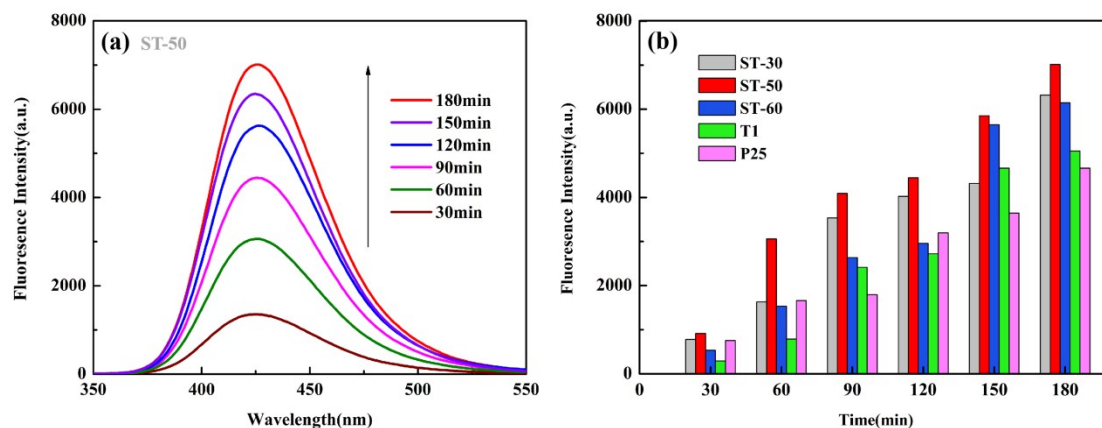

**Fig. S7.** Photo-luminescence spectra of ST-50 at excitation wavelength of 315nm (a) and photo-luminescence intensity against irradiation time for samples at the emission wavelength of 425nm (b).
